# Supplementary material for: Synergistic activation of persulfate by a manganese cobalt oxide/reduced graphene oxide nanocomposite with enhanced degradation of trichloroethylene
Source: Royal Society of Chemistry journal article supplement (doi:10.1039/d3ra03834c), 2023-01-01
Supplement: d3ra03834c1.pdf [file d3ra03834c1.pdf]

## Electronic Supplementary information

### **Synergistic activation of persulfate by manganese cobalt oxide/reduced graphene oxide nanocomposite with enhanced degradation of trichloroethylene**

Lu Zhang<sup>a, b</sup>, Pengfei Ji<sup>a</sup>, Rui Song<sup>a</sup>, Jiayuan Li<sup>a</sup>, Kaifeng Qin<sup>b</sup> and Gang Xu<sup>\*a, b</sup>

<sup>a</sup>School of Environmental and Chemical Engineering, Shanghai University, 99 Shangda Road, Shanghai 200444, P.R. China.

<sup>b</sup>Key Laboratory of Organic Compound Pollution Control Engineering, Ministry of Education, Shanghai 200444, P.R. China.

† Gang Xu, E-mail addresses: xugang@shu.edu.cn

**Computational Details.** Density functional theory (DFT) calculations were performed by using the Vienna ab Initio simulation package (VASP). The projector augmented wave (PAW) potentials and generalized gradient approximation (GGA) of the Perdew-Burke-Ernzerhof (PBE) functional were used for the electron-ion interaction and exchange-correlation energy, respectively. The cutoff energy of the plane wave basis was set to 400 eV. The convergence criteria for the total energy and force were set to  $10^{-5}$  eV and  $0.02$  eV  $\text{\AA}^{-1}$ , respectively. The DFT-D3 correction method was used to describe the van der Waals (vdW) interaction. A vacuum distance of at least  $15$   $\text{\AA}$  in the z direction was imposed to eliminate the interactions between the periodic images.

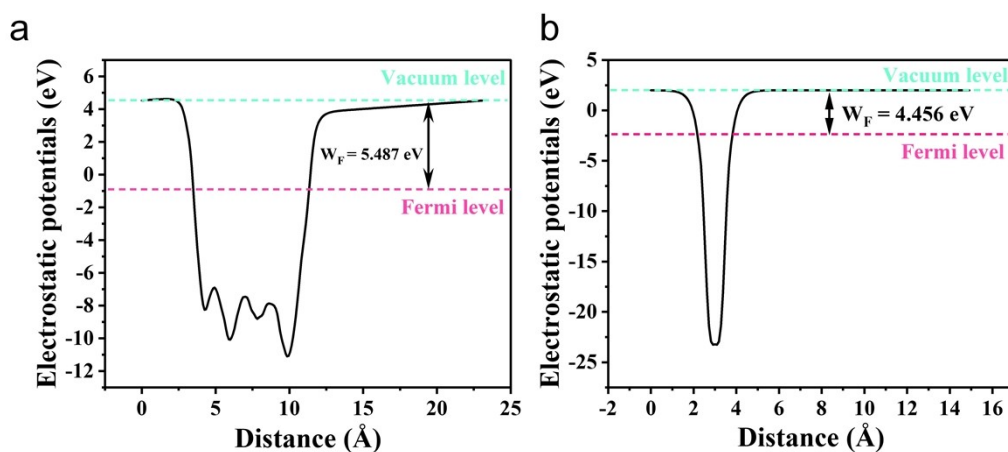

**Fig. S1** Potential diagrams of (a) MnCo<sub>2</sub>O<sub>4</sub> (311) and (b) rGO surface obtained from first-principles simulations.

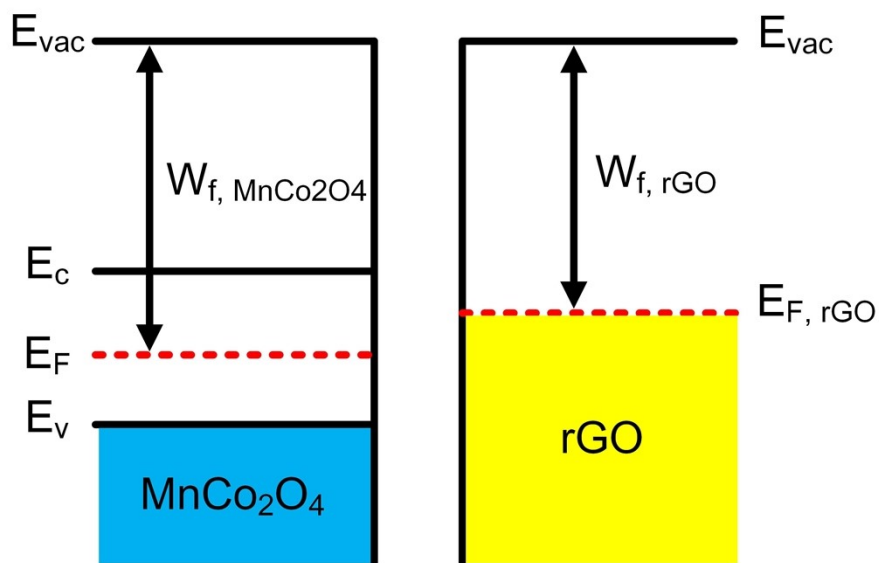

**Fig. S2** Energy band diagrams of  $\text{MnCo}_2\text{O}_4$  and rGO contacts:  $E_{\text{vac}}$ , vacuum energy;  $E_c$ , energy of conduction band minimum;  $E_v$ , energy of valence band maximum;  $W_{f, \text{MnCo}_2\text{O}_4}$ ,  $\text{MnCo}_2\text{O}_4$  work function;  $W_{f, \text{rGO}}$ , rGO work function;

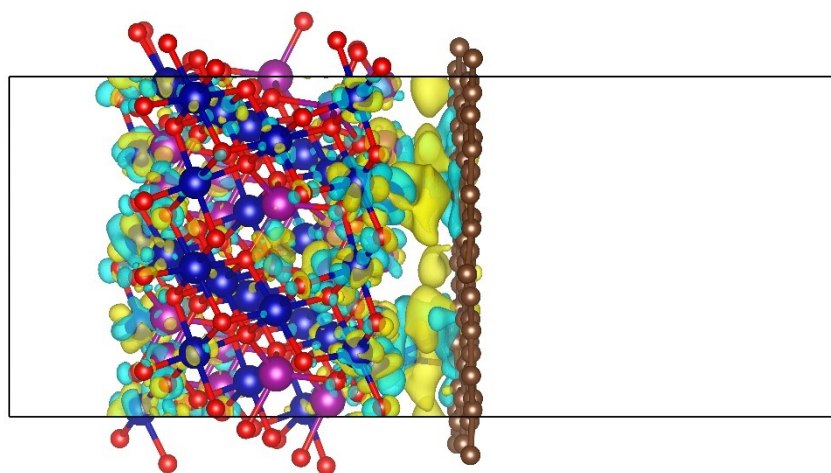

**Fig. S3** Charge density difference of  $\text{MnCo}_2\text{O}_4$  and rGO. The blue, purple, red, and brown represent the elements of cobalt, manganese, oxygen and carbon, respectively.

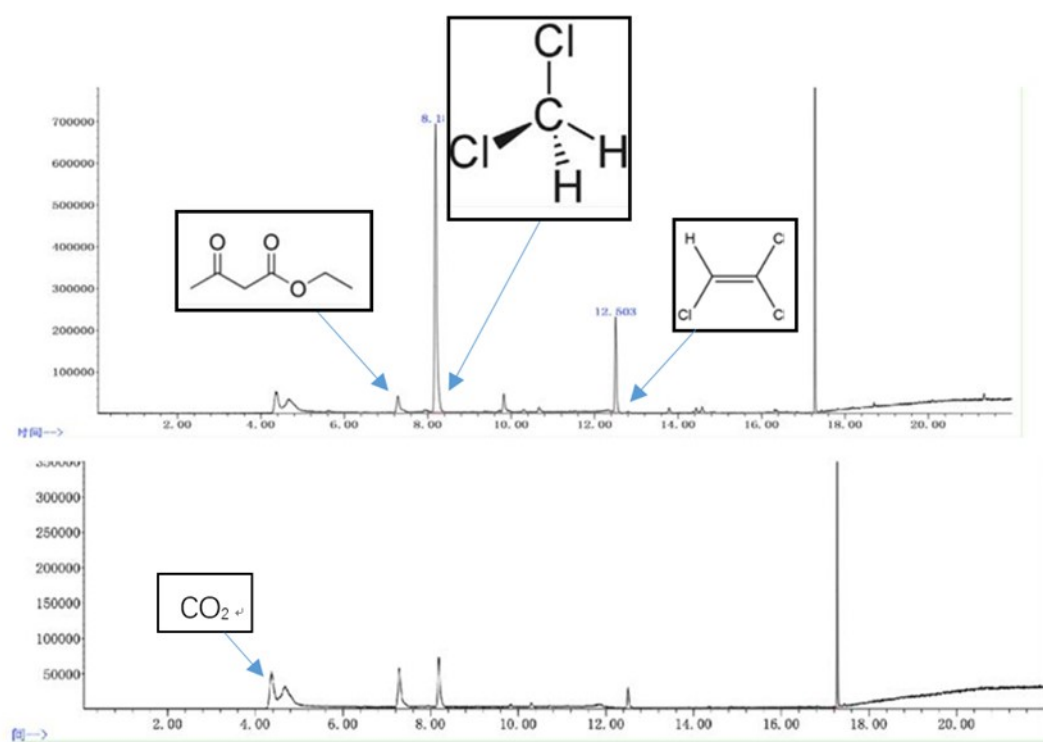

**Fig. S4** The GC-MS spectrum of TCE degradation
